1 Simultaneous pure  $T_2$  and varying  $T_2'$ -weighted BOLD fMRI using  
2 Echo Planar Time-resolved Imaging (EPTI) for mapping laminar  
3 fMRI responses

4 Fuyixue Wang <sup>a,b\*</sup>, Zijing Dong <sup>a,c</sup>, Lawrence L. Wald <sup>a,b,d</sup>, Jonathan R. Polimeni <sup>a,b,d</sup>, Kawin  
5 Setsompop <sup>e,f</sup>

6 <sup>a</sup> Athinoula A. Martinos Center for Biomedical Imaging, Massachusetts General Hospital, Charlestown,  
7 Massachusetts, USA

8 <sup>b</sup> Harvard-MIT Health Sciences and Technology, MIT, Cambridge, Massachusetts, USA

9 <sup>c</sup> Electrical Engineering and Computer Science, MIT, Cambridge, Massachusetts, USA

10 <sup>d</sup> Department of Radiology, Harvard Medical School, Boston, Massachusetts, USA

11 <sup>e</sup> Department of Radiology, Stanford University, Stanford, USA

12 <sup>f</sup> Department of Electrical Engineering, Stanford University, Stanford, USA

13 \_\_\_\_\_

14

15

16

17 **\*Correspondence to:**

18 Fuyixue Wang,

19 Athinoula A. Martinos Center for Biomedical Imaging, Department of Radiology

20 Massachusetts General Hospital

21 Charlestown, MA 02129

22 Email: [fwang18@mgh.harvard.edu](mailto:fwang18@mgh.harvard.edu)

1    **Abstract**

2           Spin-echo (SE) BOLD fMRI has high microvascular specificity, but its most common acquisition  
3 method, SE-EPI, suffers from  $T_2'$  contrast contamination with undesirable draining vein bias. To address  
4 this, in this study, we extended a recently developed multi-shot EPI technique, Echo-Planar Time-resolved  
5 Imaging (EPTI), to laminar SE-fMRI at 7T to obtain pure spin-echo BOLD contrast with minimal  $T_2'$   
6 contamination for improved specificity. We also developed a framework to simultaneously obtain a series  
7 of asymmetric SE (ASE) images with varying  $T_2'$  weightings, and extracted from the same data equivalent  
8 conventional SE multi-shot EPI images with different ETLs, to investigate the  $T_2'$ -induced macrovascular  
9 contribution across the spin-echo readout. A low-rank spatiotemporal subspace reconstruction was  
10 implemented for the SE-EPTI acquisition, which incorporates corrections for both shot-to-shot phase  
11 variations and dynamic  $B_0$  drifts. SE-EPTI was used in a visual task fMRI experiment to demonstrate that  
12 i) the pure SE image provided by EPTI results in the highest microvascular specificity; ii) the ASE EPTI  
13 image series, with a graded introduction of  $T_2'$  weightings at time points farther away from the pure SE,  
14 show a gradual sensitivity increase accompanied by a larger and larger draining vein bias; iii) a longer ETL  
15 in the conventional SE EPI acquisition will induce more draining vein bias. Consistent results were  
16 observed across multiple subjects, demonstrating the robustness of the proposed technique for SE-BOLD  
17 fMRI with high specificity.

18

19

20

21    **Key Words:** high field, multi-echo fMRI, spin-echo, microvascular specificity, layer

22

## 1 1. Introduction

2 Gradient-echo (GE) blood oxygenation level-dependent (BOLD) with  $T_2^*$  weighting is one of the most  
3 commonly used fMRI contrasts due to its high sensitivity and acquisition efficiency (Bandettini et al., 1992;  
4 Kwong et al., 1992; Ogawa et al., 1990). However, the signal change of GE BOLD contains a mixture of  
5 contribution from both macro- and micro-vessels. The macrovascular signals, such as those from the  
6 draining veins, can be far away from the actual origin of neuronal activities (Havlicek and Uludağ, 2020;  
7 Heinzle et al., 2016; Markuerkiaga et al., 2016). Therefore, the inclusion of macrovascular signal in GE  
8 BOLD fMRI significantly limits its effective resolution to detect brain activities, even at high spatial  
9 resolution at ultra-high-field.

10 By contrast, the microvascular signal can reflect more specific and precise localization of the neuronal  
11 activities (Dumoulin et al., 2018; Norris and Polimeni, 2019), therefore, a number of alternative fMRI  
12 contrasts have been investigated to achieve high neuronal specificity based on microvascular-sensitive  
13 contrasts with low macrovascular sensitivity (De Martino et al., 2018; Huber et al., 2019; Koopmans and  
14 Yacoub, 2019). Among those, spin-echo (SE) or  $T_2$  BOLD fMRI has shown great potential (Bandettini and  
15 Wong, 1995; Boxerman et al., 1995; Ogawa et al., 1993) and has been proved to provide superior specificity  
16 than GE BOLD (Huber et al., 2017a). However, it is difficult to efficiently obtain pure  $T_2$ -weighting without  
17 contrast contamination (Norris, 2012), which compromises its achievable neuronal specificity.

18 This difficulty originates from the technical challenges in conventional MRI acquisition. For example,  
19 the most commonly-used  $T_2$  BOLD acquisition method, spin-echo EPI, uses a long echo-train-length (ETL)  
20 that samples both  $T_2$ - and  $T_2'$ -weighted signals to generate an image, and therefore suffers from  $T_2'$   
21 contamination with an undesirable sensitivity to large blood vessels (Bandettini et al., 1994; Birn and  
22 Bandettini, 2002; Goense and Logothetis, 2006; Norris, 2012; Yacoub et al., 2003). In-plane acceleration  
23 with parallel imaging or multi-shot EPI (ms-EPI) can be used to address this issue by reducing the effective  
24 echo spacing and the ETLs. However, their abilities to reduce  $T_2'$  contribution come at a cost of higher  
25 noise amplification or image artifacts due to shot-to-shot phase variations, and residual  $T_2'$  contamination  
26 as well as distortion and blurring. Other alternative sequences have been proposed to provide  $T_2$  BOLD  
27 contrast (Barth et al., 2010; Bowen et al., 2005; Chamberlain et al., 2007; Constable et al., 1994; Denolin  
28 and Metens, 2003; Goerke et al., 2011; Miller et al., 2003; Polimeni et al., 2017; Poser and Norris, 2007;  
29 Scheffler et al., 2001). Among those, 3D-GRASE uses multiple refocusing pulses with short echo trains in  
30 between, which significantly reduces the  $T_2'$  weightings and offers higher specificity than conventional SE-  
31 EPI (Beckett et al., 2020; De Martino et al., 2013; Feinberg et al., 2008; Kemper et al., 2015; Olman et al.,  
32 2012; Park et al., 2021). Recent works have demonstrated its specificity for high-resolution SE BOLD fMRI  
33 at 7T (Beckett et al., 2020; Kemper et al., 2015), but challenges including high SAR, relatively small  
34 achievable coverage and a mixture of  $T_1$  weightings from stimulated echoes (Goerke et al., 2007) remain

1 to be addressed or interpreted. In addition to SE BOLD fMRI, non-BOLD contrasts such as cerebral blood  
2 volume (CBV) has shown promising results as well, such as using the vascular space occupancy (VASO)  
3 methods (Chai et al., 2020; Huber et al., 2020; Huber et al., 2014; Huber et al., 2017b; Jin and Kim, 2006;  
4 Lu et al., 2003; Lu et al., 2004).

5 In this study, to address the  $T_2'$ -contamination of SE-EPI and obtain higher neuronal specificity with  
6 minimal draining vein effects, we extended a recently developed technique, Echo-Planar Time-resolved  
7 Imaging (EPTI) (Wang et al., 2019; Wang et al., 2020; Wang et al., 2021), to high resolution SE-fMRI at  
8 ultra-high-field for mapping laminar fMRI responses. EPTI is a novel multi-shot EPI approach that has  
9 been previously developed for efficient multi-contrast and quantitative mapping. It employs a novel  
10 spatiotemporal encoding strategy in the frequency-echo ( $k$ - $t$ ) domain, and is therefore able to resolve a  
11 series of multi-contrast images across the readout with a small TE increment as short as an echo spacing  
12 ( $\sim 1$  ms). The images are also distortion- and blurring-free, providing accurate anatomical information for  
13 high resolution imaging. In addition, the continuous signal readout scheme and the use of spatiotemporal  
14 correlation to recover the  $k$ - $t$  undersampled data in EPTI result in high acquisition efficiency, allowing us  
15 to acquire multi-echo images at submillimeter isotropic resolution within a few shots.

16 Here, we showed that the time-resolved feature of EPTI can not only provide pure  $T_2$  contrast images  
17 to increase microvascular specificity, but can also simultaneously acquire  $T_2'$ -weighted images to  
18 investigate the macrovascular contribution across the spin-echo readout. Specifically, using a SE-EPTI  
19 acquisition, we obtained a pure SE image with minimal  $T_2'$  contamination, and a series of asymmetric SE  
20 (ASE) images with varying  $T_2'$  weightings. We also developed a framework to extract conventional SE ms-  
21 EPI images with different ETLs (therefore with different levels of  $T_2'$ -contamination) from the same dataset,  
22 but without any distortion. This ensures that all images concurrently acquired in a SE-EPTI acquisition,  
23 including the pure SE, ASEs and the extracted conventional SE-EPIs are perfectly matched and aligned. A  
24 subspace reconstruction (Dong et al., 2020; Liang, 2007; Tamir et al., 2017) was further implemented for  
25 SE-EPTI datasets, which incorporates corrections for both dynamic  $B_0$  drifts and shot-to-shot phase  
26 variations caused by physiological and respiratory motions. A 3-shot SE-EPTI protocol was developed to  
27 acquire a thick slab that sufficiently covers the visual cortex at submillimeter resolution (0.9 mm isotropic).  
28 Through cortical depth analyses, we demonstrated that the pure SE image provided by EPTI results in the  
29 highest microvascular specificity as expected, and the ASE EPTI image series, with a graded introduction  
30 of  $T_2'$  weightings at time points farther away from the pure SE, show gradually increased sensitivity, but  
31 larger and larger draining vein bias. Using the same dataset, we also experimentally validated that a longer  
32 ETL in the conventional SE EPI acquisition will induce more draining vessel bias.

## 1 2. Material and methods

### 2 2.1. EPTI for pure contrast multi-echo imaging

3 Conventional EPI acquires one phase encoding position per readout line through a fast continuous  
 4 bipolar readout, and forms a single image by combing all those signals acquired at different time points.  
 5 Although its image contrast is mainly determined by the “effective” echo time (TE), the time when the  
 6 central PE line is acquired, signal decay occurs across the sampling window and contrast weightings from  
 7 other time points also contribute to the final image. For SE-EPI acquisition, the signal magnitude  $S(t)$  at  
 8 time  $t$  after excitation in a mono-exponential model is:

$$9 \quad S(t) = \begin{cases} S(0)e^{-TE_{SE}*R_2'}e^{-(R_2-R_2')t} = S(0)e^{(t-TE_{SE})*R_2'}e^{-R_2t} & t < TE_{SE} \\ S(0)e^{TE_{SE}*R_2'}e^{-(R_2+R_2')t} = S(0)e^{(TE_{SE}-t)*R_2'}e^{-R_2t} & t > TE_{SE} \end{cases}, \quad (1)$$

10 where  $S(0)$  represents the initial signal intensity at  $t = 0$ ,  $TE_{SE}$  is the echo time of the spin-echo,  $R_2$   
 11 is the  $T_2$  relaxation rate,  $R_2' = R_2^* - R_2$ , representing the difference between  $T_2^*$  and  $T_2$  relaxation rates  
 12 and reflecting the susceptibility-induced recoverable intra-voxel dephasing, which is sensitive to  
 13 macrovascular signals. As shown in the signal model, pure  $T_2$ -weighted signal can be obtained at  $TE_{SE}$ ,  
 14 while all the other time points will be affected by  $R_2'$ -weighting with an extend determined by their time  
 15 distance to the SE point. Signals acquired at those time points with  $R_2'$ -weighting will therefore cause  
 16 contrast contamination in SE-EPI when they are combined to form an EPI image, leading to increased  
 17 sensitivity to large vessels and compromised neuronal specificity.

18 The main concept of SE-EPTI is to recover a series of images across the readout at all those time points  
 19 by recovering fully-sampled data across the  $k-t$  space (Dong et al., 2020; Wang et al., 2019). Figure 1a  
 20 shows the sequence diagram of SE-EPTI that is used to achieve this goal, where an EPI-like continuous  
 21 readout is used in a SE acquisition with different  $G_y$  gradient blips applied to sample a  $k_y$ -segment in  $k-t$   
 22 space using a spatiotemporal CAIPI encoding pattern (Fig. 1a). This sampling pattern not only ensures that  
 23 the neighboring  $k_y$  points are sampled at a short time interval with high temporal correlations, but also that  
 24 they are interleaved and complementary along the  $k_y$  direction in an optimized pattern. It allows efficient  
 25 use of temporal correlation and coil sensitivity to achieve high undersampling, therefore only a few EPTI  
 26 shots are needed to cover the desired  $k-t$  space for imaging. After the full  $k-t$  space is recovered in the  
 27 reconstruction, multi-contrast images with pure contrast at all time points can be simply obtained by an  
 28 inverse Fourier transform, including a pure  $T_2$  SE image and a series of ASE images with varying  $T_2'$   
 29 weighting, spaced at a TE increment of an echo-spacing ( $\sim 1$  ms) as shown in Fig. 1b. These images are free  
 30 from any distortion and blurring artifacts, which are common in conventional EPI due to  $B_0$ -inhomogeneity-  
 31 induced phase accumulation and signal decay across the readout. This is because each EPTI image is  
 32 recovered using signals with exactly the same phase and magnitude.

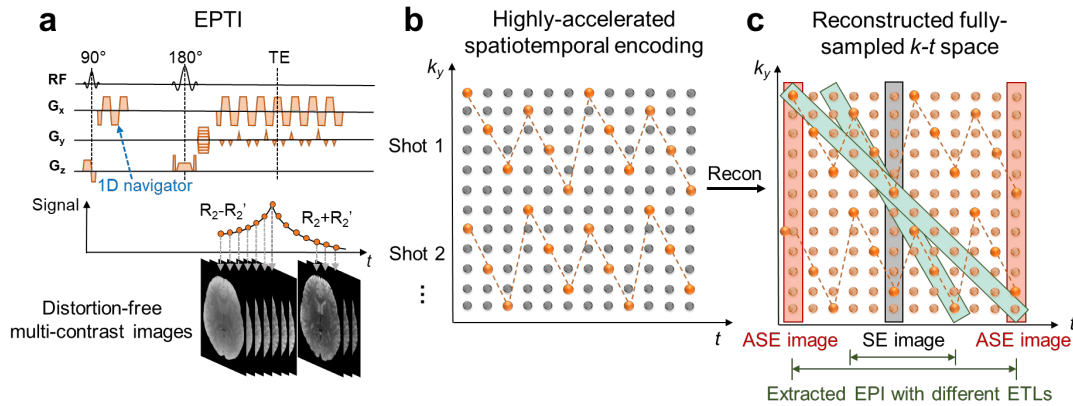

1  
2 **Figure 1.** Spatiotemporal CAIPI encoding of EPTI and generation of multi-contrast images. The  
3 recovered  $k$ - $t$  data after reconstruction can provide asymmetric SE (ASE) images with both  $T_2$  and  $T_2'$   
4 weighting (orange), SE image with pure  $T_2$  weighting (gray), and extracted SE-EPI with different ETLs  
5 (green) to investigate the effect of  $T_2'$  contamination.

6 **2.2. Extracted conventional EPI with different echo train lengths**

7 In conventional SE-EPI acquisition, the reduction of ETL can help reduce the level of  $R_2'$   
8 contamination, which can be achieved through in-plane acceleration using parallel imaging and/or through  
9 multi-shot segmentation. However, a large reduction factor in ETL would lead to large noise amplification  
10 and aliasing artifacts in parallel imaging and/or long acquisition time in multi-shot acquisition. Therefore,  
11 it remains challenging to achieve short ETLs for SE-EPI especially at high spatial resolution.

12 To investigate the benefit of reducing  $T_2'$  contamination by using a shorter ETL as well as comparing  
13 the conventional SE-EPI with the pure SE images, conventional EPI-like acquisition with different ETLs  
14 are extracted from the reconstructed  $k$ - $t$  data acquired by EPTI. Fig. 1c shows a simplified illustration of  
15 such extraction, where reconstructed  $k$ -space signals at different TEs are extracted in a diagonal pattern in  
16  $k$ - $t$  space. To mimic an interleaved ms-EPI acquisition, multiple adjacent PE lines are extracted at each time  
17 point depending on the shot number (e.g., 4 PE lines for a 4-shot EPI), and the final ETL is determined by  
18 the overall matrix size along PE direction as well as the shot number. For example, to mimic a 4-shot EPI  
19 acquisition with a matrix size of 144, 4 PE lines are extracted at each time point, and the resultant ETL will  
20 be 36. Before the extraction,  $B_0$ -induced phase is removed from the  $k$ - $t$  data by removing the TE-dependent  
21 linear phase changes in the image domain, so that the extracted SE-EPI images are also free from any  
22 distortion. This ensures that all the image contrasts obtained concurrently from a single EPTI dataset,  
23 including the pure SE, the ASE series and the extracted SE-EPI, are geometrically matched, allowing for  
24 reliable evaluation of the impact of  $T_2'$  contamination with different ETLs on the signal contributions.

### 1 2.3. Subspace image reconstruction

2 The reconstruction framework of EPTI used in this study is shown in Fig. 2. To reconstruct the image  
3 series from the undersampled  $k$ - $t$  data, a low-rank subspace method (Dong et al., 2020; Liang, 2007; Tamir  
4 et al., 2017) is applied to improve the conditioning of the reconstruction (Fig. 2c). Here, the reconstruction  
5 is performed to estimate a small number of coefficient maps of pre-calculated temporal subspace bases that  
6 can accurately represent the signal evolution, rather than to estimate all of the time-series images directly.  
7 Such a reconstruction approach can achieve good reconstruction accuracy by taking advantage of the high  
8 spatiotemporal correlation in the EPTI datasets. In this work, we tailor this subspace reconstruction  
9 specifically to the SE-EPTI acquisition and further incorporate corrections for phase variations due to  $B_0$   
10 changes across different shots and dynamics, increasing the robustness and accuracy of the reconstruction  
11 for fMRI experiments.

12 In the reconstruction, the first step is to use principal component analysis (PCA) to generate a group  
13 of subspace bases  $\phi$  from Bloch-equation simulated signal evolutions across a range of possible  $T_2$  and  $T_2^*$   
14 values. The number of bases is selected to approximate the simulated signal evolutions accurately with an  
15 error of <1%. Then, the coefficient map of the bases,  $c$ , is estimated by:

$$16 \min_c \|UFSB\phi c - y\|_2^2 + \lambda R(c), \quad (2)$$

17 Here,  $B$  is the image phase evolutions,  $S$  is the sensitivity map,  $F$  denotes the Fourier transform,  $U$   
18 represents an undersampling mask, and  $y$  is the acquired undersampled data.  $R$  is the locally low-rank (LLR)  
19 constraint applied on the coefficients to further improve the conditioning, and  $\lambda$  is the control parameter.  
20 The image phase  $B$  and coil sensitivity  $S$  are estimated from a low-resolution  $k$ - $t$  calibration scan acquired  
21 prior to the imaging scan. After estimating the coefficients, multi-contrast images can be recovered by  
22 performing a temporal expansion ( $\phi c$ ) for all the time points.

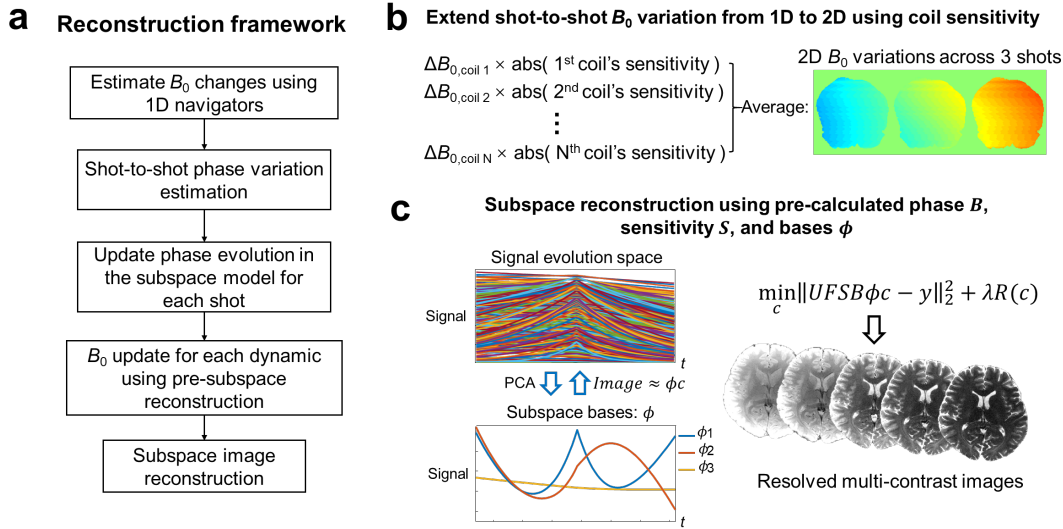

1  
2 **Figure 2.** (a) EPTI reconstruction framework with dynamic  $B_0$  correction and shot-to-shot phase  
3 variation correction. (b) Illustration of the estimation method for shot-to-shot  $B_0$  variation using multi-  
4 channel 1D navigators. (c) Subspace reconstruction to resolve multi-contrast images by solving a few  
5 coefficient maps of the subspace bases.

#### 6 2.4. Shot-to-shot phase variation correction using navigator

7 The  $B_0$ -inhomogeneity-induced phase accumulation could change temporally due to  $B_0$  drift and/or  
8 respiratory motion. Instead of inducing aliasing artifacts as in the conventional interleaved ms-EPI, such  
9 phase variations were shown to only cause minor local image smoothing on EPTI images due to the  $k_y$   
10 block-segmented sampling pattern used (Wang et al., 2019). To mitigate this smoothing effect and improve  
11 the reconstruction accuracy, a method to estimate and correct for such shot-to-shot phase variations is  
12 incorporated into the reconstruction framework as shown in Fig. 2.

13 One dimensional (1D)  $B_0$  changes along  $x$  between all of the EPTI-shots and temporal dynamics are  
14 calculated first. Specifically, the phases of the 1<sup>st</sup> and 3<sup>rd</sup> echo of the standard 3-line navigator are subtracted  
15 and scaled based on their TEs to obtain the  $B_0$  of every TR, and then the relative  $B_0$  changes to the first TR  
16 are calculated. The 1<sup>st</sup> and 3<sup>rd</sup> echo are used in this calculation to avoid odd-even echo phase difference in  
17 the bipolar readout. These 1D  $B_0$  changes are then extended to 2D by using the spatial information provided  
18 by the multi-channel coil sensitivities (Splitthoff and Zaitsev, 2009; Versluis et al., 2012; Wallace et al.,  
19 2020). Since the shot-to-shot  $B_0$  change varies smoothly in the spatial domain, the low-frequency spatial  
20 information provided by the multi-channel coils should be sufficient in capturing and recovering its spatial  
21 distribution along the PE direction. Specifically, the 2D  $B_0$  change,  $\Delta B_{2D}$ , can be approximated by a  
22 weighted combination of the 1D  $B_0$  changes from different coils using the magnitude of their coil  
23 sensitivities, similar to a previous approach (Versluis et al., 2012). The estimation process is as follows:



$$\Delta B_{2D} = \frac{1}{N} \sum_{i=1}^N \Delta B_{1D,i} |S_i|, \quad (3)$$

where  $\Delta B_{1D,i}$  is the 1D  $B_0$  change estimated from the  $i$ -th coil, and  $|S_i|$  is the magnitude of the  $i$ -th coil's sensitivity map. Next, to correct for the shot-to-shot  $B_0$  changes in the reconstruction, the phase term  $B$  in Eq. 2 is updated to incorporate the above estimated  $B_0$ -induced phase into the forward model. A simulation experiment was performed to evaluate the effectiveness of the proposed shot-to-shot phase variation correction approach. The simulated data were generated using the imaging parameters and a set of quantitative maps ( $T_2$ ,  $T_2^*$ ,  $B_0$  map) obtained from EPTI data in the in-vivo experiments, with additional smooth  $B_0$  changes (spatially 2<sup>st</sup> order) added to each shot as described below.

To account for higher order  $B_0$  spatial changes, a pre-reconstruction process is also implemented to update the  $B_0$  maps across different dynamics. It uses pre-reconstructed 2D phase maps to help better estimate higher-frequency spatial variations of  $B_0$  changes, which can be used to adjust the forward model to improve the reconstruction accuracy. In the  $B_0$  update pre-reconstruction, a set of complex subspace bases are first extracted from simulated signals with a range of  $B_0$  changes, which are then used in the reconstruction model to estimate higher order phase evolution and  $B_0$ . The estimated  $B_0$  changes are filtered by a hamming filter to remove any noise and potential artifacts, and then incorporated into the final image reconstruction by updating the phase term  $B$  (Eq. 2), similar to the approach described in (Dong et al., 2021). More number of bases were used in the  $B_0$  update pre-reconstruction than in the image reconstruction (6 complex bases vs. 3 real bases) to provide additional degrees of freedom to model and estimate large  $B_0$  phase evolution at 7T.

## 2.5. Data acquisition

All data were acquired with a consented institutionally approved protocol on a Siemens Magnetom Terra 7T scanner (Siemens Healthineers, Erlangen, Germany), using a custom-built 64-channel receiver coil (Mareyam et al., 2020) with a single RF transmission channel.

SE-EPTI data were acquired on 3 healthy volunteers using the following acquisition parameters: FOV =  $218 \times 130 \times 25.2$  (RO  $\times$  PE  $\times$  slice, HF-LR-AP) mm<sup>3</sup>, matrix size =  $240 \times 144 \times 28$ , 0.9-mm isotropic resolution, number of EPTI-shots (segmentation) = 3, number of echoes = 45, TE<sub>range</sub> = 40–88 ms, TE of SE = 64 ms, echo spacing (TE-increment) = 1.09 ms, volume TR = 3 s  $\times$  3-shot = 9 s, 43 dynamics, acquisition time per run = 6 min 27 s, 14 runs were acquired for each subject. A standard block-design checkerboard visual stimulus with contrast-reversing at 8 Hz was performed for the fMRI acquisitions. An initial 27-s fixation period was performed followed by four 36 s-54 s on-and-off blocks. To assist with fixation, a red dot with time-varying brightness was positioned at the center of the screen, and the subjects were asked to press a button as soon as they detected a change in its brightness. Before the EPTI data acquisition in each run, a fast  $k$ - $t$  calibration scan was acquired in 54 s with a matrix size of  $240 \times 49 \times 28$

1 (RO × PE × slice) and 7 echoes. For each volunteer, a multi-echo magnetization-prepared rapid gradient  
2 echo (MEMPRAGE) (van der Kouwe et al., 2008) image was acquired at 0.75-mm isotropic resolution as  
3 an anatomical reference with a FOV of = 218 × 168 × 194 (AP-LR-HF) mm<sup>3</sup>.

4 Conventional single-shot SE-EPI and GE-EPI were also acquired for comparison on one of the healthy  
5 volunteers. The acquisition parameters for SE-EPI were: FOV = 218 × 130 × 25.2 (RO × PE × slice, HF-  
6 LR-AP) mm<sup>3</sup>, matrix size = 240 × 145 × 28, 0.9-mm isotropic resolution, TE = 64 ms, GRAPPA factor =  
7 3, ETL = 52 ms, echo spacing = 1.09 ms, TR = 3 s. The GRAPPA factor of 3 was used here to allow the  
8 same TE to be achieved as the EPTI acquisition. The GE-EPI used the same FOV and resolution, other  
9 acquisition parameters were: TE = 28 ms, GRAPPA factor = 4, ETL = 39 ms, echo spacing = 1.09 ms, TR  
10 = 3 s. Noted that a GRAPPA factor of 3 or 4 used here is already high, considering the small FOV along PE  
11 in our acquisition (i.e., ~ 1.6x zoomed compared to standard axial scan with PE along AP). 129 dynamics  
12 were acquired per run for both GE- and SE-EPI in an acquisition time of 6 min 27 s. 4 runs were acquired  
13 for both GE- and SE-EPI. In order to estimate field maps and correct for distortions, PE-reversed data were  
14 acquired before the fMRI data acquisition for both GE- and SE-EPI with matched acquisition parameters.  
15 The standard GRAPPA (Griswold et al., 2002) reconstruction was performed followed by complex coil  
16 combination (Pruessmann et al., 1999). In addition, a turbo spin-echo (TSE) image was acquired with the  
17 same FOV and matrix size as a distortion-free reference.

## 18 2.6. Image post-processing

19 To align all the volumes from different dynamics and runs, registration was performed using AFNI  
20 (Cox, 1996). For EPTI, the motion parameters were estimated using the all-echo-averaged volumes with  
21 higher SNR, which were then applied to different multi-echo volumes as well as the extracted ms-EPI  
22 images. After registration, the multi-run data were complex-averaged to a single dataset after removing the  
23 low-frequency background phase. For ss-EPI, distortion correction was performed using the  $B_0$  maps  
24 estimated from ‘topup’ (Andersson et al., 2003) using the pre-acquired PE-reversed data. The  $B_0$  maps were  
25 motion-corrected to account for the field map orientation change due to subject motion, and then applied to  
26 each volume using the ‘FUGUE’ function in FSL (Jenkinson et al., 2012; Smith et al., 2004).

27 For cortical analysis, surface-based cortical reconstruction was performed using Freesurfer (Desikan  
28 et al., 2006; Fischl, 2012; Fischl et al., 2002) on the MPRAGE images of each subject. 9 equi-volume  
29 (Waehnert et al., 2014; Waehnert et al., 2016) cortical layers were reconstructed, and applied to the EPTI  
30 and EPI images to investigate the distribution of the z-score and the percent signal change across different  
31 cortical depths.

## 32 3. Results

33 The effect of the shot-to-shot phase variations on the EPTI reconstruction and the performance of the

1 proposed estimation and correction methods were evaluated in Fig. 3. Large temporal  $B_0$  variations with a  
 2 range of  $\pm 10$  Hz were used in this evaluation to mimic the effect at 7T. The estimated  $B_0$  variation maps  
 3 (Fig. 3b) show similar spatial distribution with the reference (Fig. 3a), demonstrating the effectiveness of  
 4 the proposed method in estimating  $B_0$  variation using multi-channel 1D navigators. The reconstructed  
 5 images without and with correction are compared and shown for the pure SE (Fig. 3c) and a selected ASE  
 6 (Fig. 3d). The images without any added variations are also shown in the left-most columns to illustrate  
 7 baseline reconstruction errors when compared to the ground truth simulated fully-sampled data. As shown  
 8 in the error maps, the pure SE image is less affected by the phase variations and presents with only a small  
 9 increase in RMSEs even without correction, while the ASE image shows higher errors resulted from the  
 10 phase variations due to its larger  $B_0$  phase accumulation. After correction, the errors are significantly  
 11 mitigated, especially for the ASE image, and similar reconstruction accuracy is observed as in the case  
 12 without any added phase variations, demonstrating the effectiveness of the proposed correction approach.

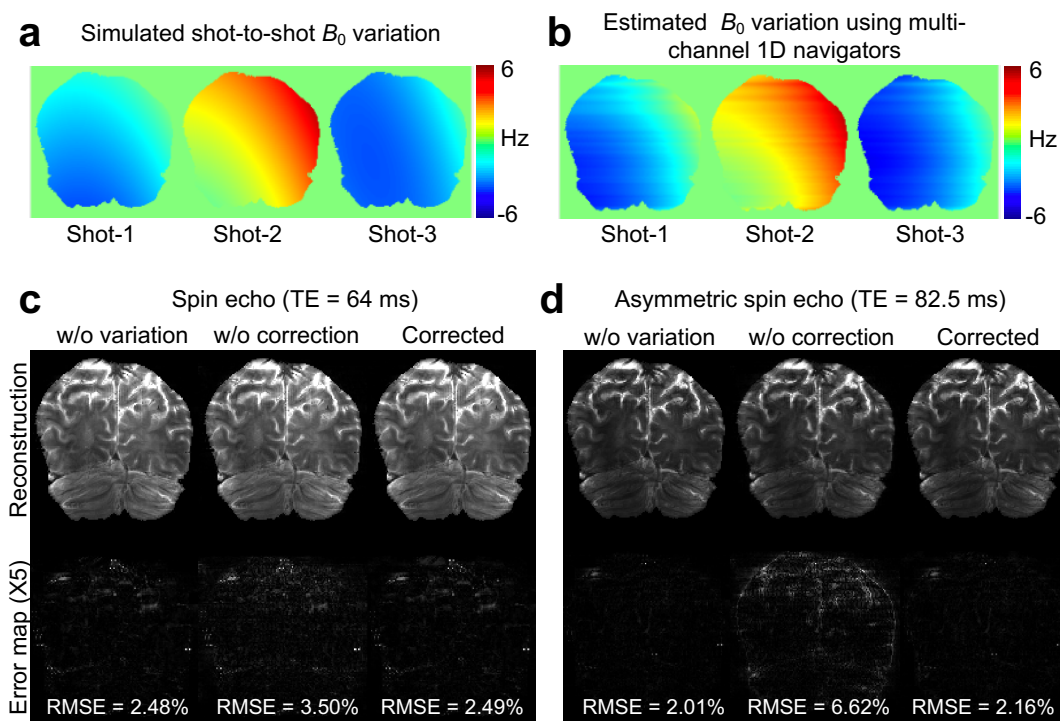

13  
 14 **Figure 3.** Evaluation of the shot-to-shot  $B_0$  variation estimation and correction method. (a) Simulated  
 15 shot-to-shot  $B_0$  variation maps of the 3-shot acquisition (spatially 2<sup>st</sup> order). (b) Estimated  $B_0$  variation maps  
 16 using multi-channel 1D navigators. (c) Reconstructed pure SE images (TE = 64 ms) and their corresponding  
 17 error maps ( $\times 5$ ) without variations, with variations but without correction, and after correction. (d)  
 18 Reconstructed images and error maps for the ASE at TE = 82.5 ms. The RMSEs were listed at the bottom  
 19 of each error map.

20 Figure 4 shows an example of the multi-echo images from a representative temporal dynamic acquired  
 21 by SE-EPTI in three orthogonal views, after averaging all the runs in the visual-task experiment at 7T. The

1 FOV of the acquisition was selected to cover the visual cortex as shown on the right. Figure 5a compares  
2 the geometric distortion between conventional SE-EPI, EPTI and EPTI extracted EPI. Two different slices  
3 are presented with overlaid brain contours (red lines) extracted from a distortion-free TSE image collected  
4 in the same scan session. The conventional EPI shows severe distortion at multiple areas highlighted by the  
5 yellow arrows. In contrast, both EPTI and the EPTI extracted EPI are free from such distortion artifacts and  
6 provide identical contours as the TSE reference. Note that the EPTI extracted EPI images were generated  
7 after removing the  $B_0$  phase in the full  $k-t$  data (not possible with conventional EPI data), therefore are free  
8 from the geometric distortion, similar to the EPTI images. In addition, EPTI is also robust to dynamic  
9  $B_0$ /susceptibility changes, and provides images free from distortion changes across time as demonstrated in  
10 Fig. 5b. As shown in the zoom-in 1D signal profile along the PE direction (extracted from the locations  
11 indicated by the yellow dotted lines) across different dynamics and runs, conventional EPI suffers from  
12 dynamic changes in distortion that are hard to correct for, while the signal profiles of EPTI and EPTI  
13 extracted EPI are almost static and consistent across time.

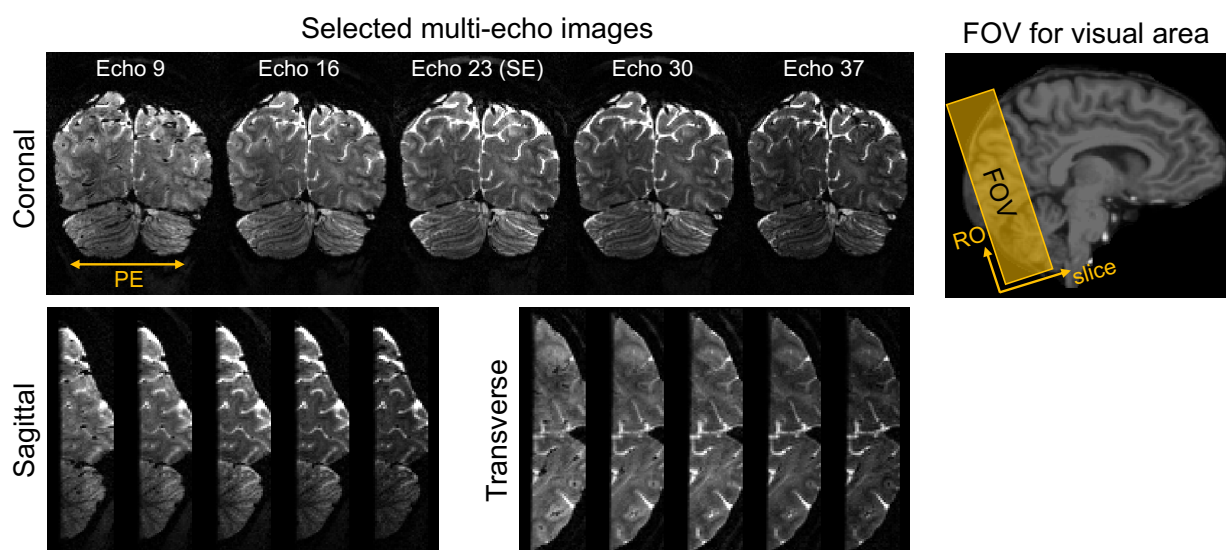

**Figure 4.** Examples of multi-echo EPTI images (left) acquired in the fMRI experiment covering the visual cortex (right). The images are shown for each dynamic after averaging all the runs. Three orthogonal views are presented for 5 selected echoes out of the total 45 echoes.

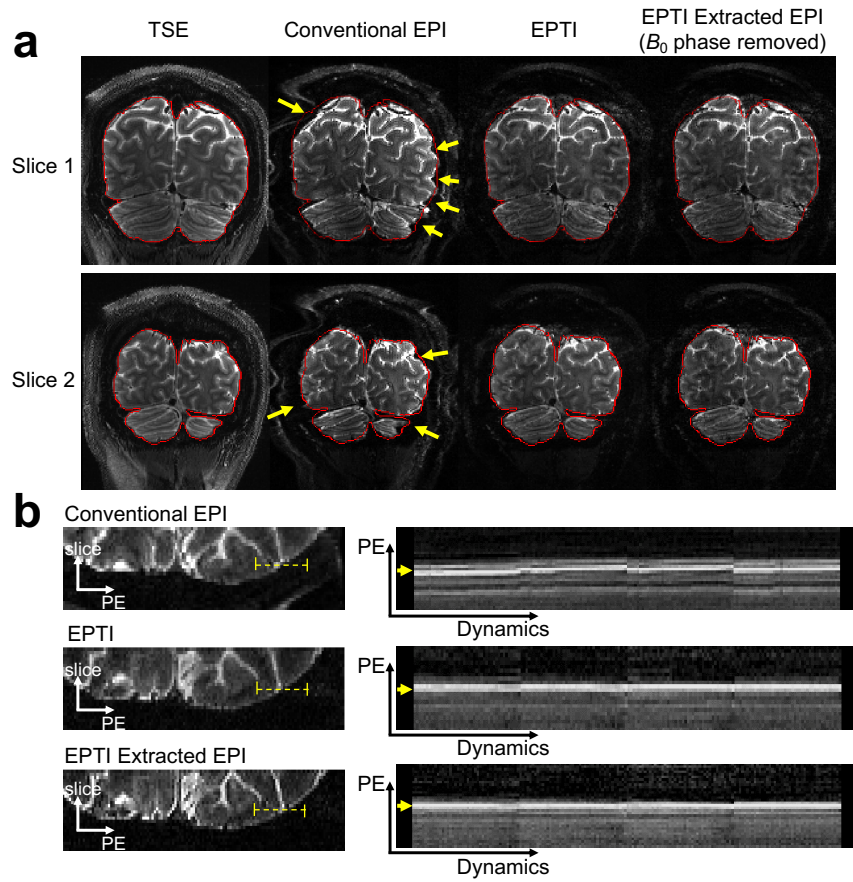

1  
2  
3  
4  
5  
6  
7  
8

**Figure 5.** (a) Distortion comparison between the TSE reference, conventional EPI, EPTI and EPTI extracted EPI. The image contours extracted from the TSE image are applied to all images (red lines). Conventional EPI shows obvious distortions at multiple areas (yellow arrows), while EPTI and EPTI extracted EPI have almost identical image contours with the TSE image. (b) Evaluation of dynamic distortion changes. The zoomed-in 1D PE profiles (extracted from the locations indicated by the yellow dotted lines on the left) across different dynamics and runs are shown on the right to compare the level of dynamic distortion in conventional EPI, EPTI and EPTI extracted EPI.

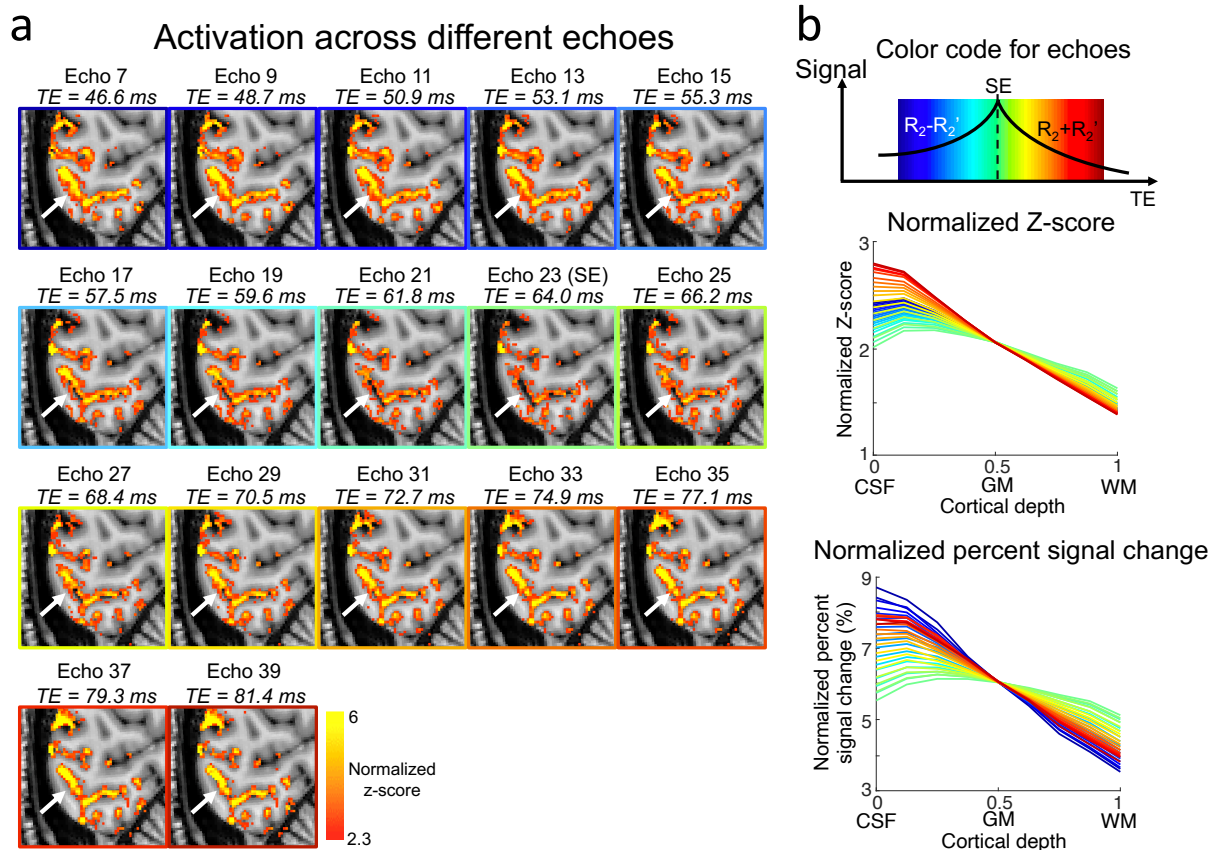

1  
2 **Figure 6.** (a) Normalized z-score activation maps of different EPTI echo images. The white arrow  
3 shows an example region where the activation in the CSF is reduced relative to that in the gray matter in  
4 echoes with less  $T_2'$  contributions. Normalization was performed based on the sum of the positive z-scores  
5 of each echo to normalize the sensitivity differences and to better visualize activation pattern. (b) Cortical  
6 depth dependent profiles of z-score and percent signal change of all the echoes (color-coded by echo indices  
7 shown on the top). The profiles from different echoes are normalized to have the same value at 0.5 cortical  
8 depth of the SE (echo 23) to better compare the slope difference.

9 The varying  $T_2'$  effect across the spin-echo readout was investigated using the time-resolved multi-  
10 echo EPTI images as shown in Fig. 6. Fig. 6a shows the activation maps across different echoes in  
11 normalized z-scores, where a scaling was performed across different echoes based on the sum of the positive  
12 z-scores of each echo to normalize their sensitivity difference and to better compare the activation patterns.  
13 As expected, with less  $T_2'$  contrast in the images closer to the pure spin-echo (from echo 7 to echo 23, or  
14 from echo 39 backwards to echo 23), there is less activation in the CSF region (white arrows) compared to  
15 the activation in the gray matter, with the peak of the activation gradually shifting from centering in the  
16 CSF region towards the gray matter area on the side. This can also be seen in the cortical depth dependence  
17 analysis shown in Fig. 6b, where the cortical profiles of the z-score and the percent signal change of all the  
18 echoes (color-coded by echo indices, pure SE shown in green) are plotted. The profiles from different

1 echoes were scaled to have the same value at 0.5 cortical depth as the SE (echo 23) to better compare the  
 2 slope differences. The first few echoes in blue with large amount of  $T_2'$  weightings exhibit the expected  
 3 bias to large vessels, manifesting as depth profiles that peak at the pial surface. As TE increases and moves  
 4 closer to the SE from blue to green, lower and lower pial surface bias were observed in flatter depth profiles  
 5 with lower values at the pial surface. At the SE position (pure  $T_2$ ), the smallest slope with minimal bias is  
 6 observed. Then, as TE moves away from the SE position with more  $T_2'$  weighting, the pial vessel bias  
 7 returns and the slope increases. In summary, the slope of these cortical profiles or the amount of large vessel  
 8 bias across echoes show good correspondence to the amount of  $T_2'$  weighting in the theoretical signal model,  
 9 both of which are lowest at SE, and increase with the distance away from SE. This observation  
 10 experimentally validates that, by reducing  $T_2'$  weighting in the image, the macrovascular effect can be  
 11 effectively reduced. It also demonstrates that EPTI provides a powerful tool to resolve all these multi-  
 12 contrast images across the EPTI readout, and to investigate gradual TE-dependent BOLD signal change at  
 13 a TE increment as short as 1 ms using data acquired in a single scan.

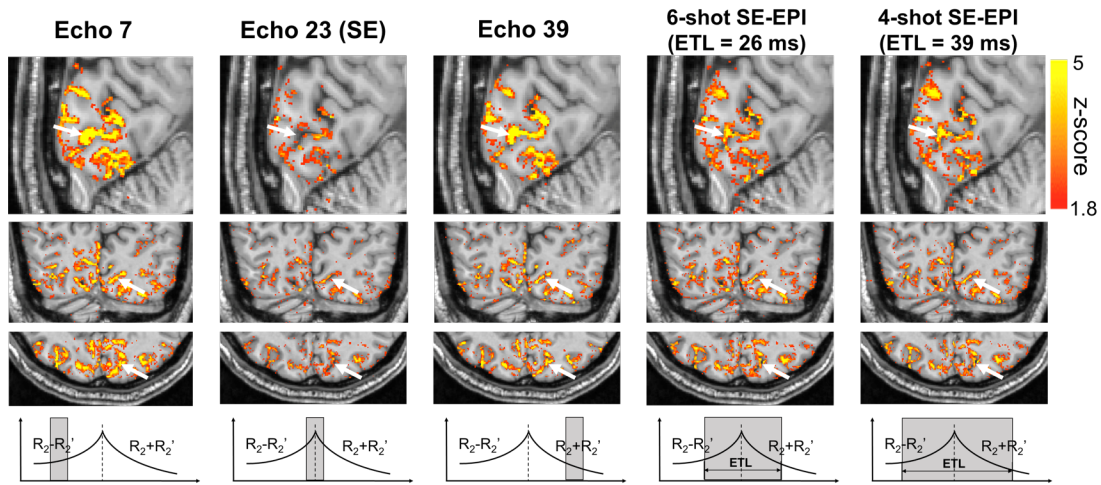

14  
 15 **Figure 7.** Comparison of activation in unnormalized z-score between ASE images, pure SE image,  
 16 and extracted SE-EPI all obtained from EPTI. The pure SE image shows lower sensitivity than ASE echoes  
 17 and the conventional SE-EPI, but despite the sensitivity difference, we can still observe that the peak of the  
 18 activation map itself is more in the gray matter regions rather than centered in the CSF as indicated by the  
 19 white arrows.

20 Figure 7 compares unnormalized activation maps (z-score) calculated from EPTI ASEs (echo 7 and  
 21 39), EPTI pure SE (echo 23), and two EPTI extracted SE ms-EPI with ETLs of 26 ms (6-shot) and 39 ms  
 22 (4-shot). The ASE images with large  $T_2'$  weightings show high activation in both the CSF and gray matter  
 23 areas. The pure SE image and the extracted SE-EPI images show overall less activations as expected due  
 24 to the reduced activation sensitivity of  $T_2$  contrast. Despite such a sensitivity difference, it can still be  
 25 observed that the three cases of  $T_2$  images, including the pure SE and the two extracted SE-EPI images,  
 26 show a reduction of activation in the CSF areas when compared to the gray matter's activation level in the

1 same maps. The pure SE image shows minimal CSF bias, pointing to EPTI's ability to provide a more pure  
 2 SE contrast with further reduction in  $T_2'$  contamination compared to the conventional ms-EPI, and achieve  
 3 higher microvascular specificity. The cortical depth analysis of these five cases in 3 healthy volunteers are  
 4 shown in Fig. 8. Both the unnormalized and normalized activity profiles are plotted. The unnormalized  
 5 profiles demonstrate the sensitivity differences between  $T_2'$  and  $T_2$  weighted BOLD contrasts as previously  
 6 described above, while the normalized profiles better compare the amount of large vessel bias through their  
 7 slope differences. Consistent with the results in Fig. 6 and 7, the data from all the three subjects show that  
 8 the pure SE EPTI image (echo 23, dark green) achieves the lowest slope and minimal macrovascular bias  
 9 compared to the ASE images and the extracted conventional SE ms-EPI. In addition, the results also validate  
 10 that the conventional SE ms-EPI with a longer ETL will have larger pial vessel bias (Fig. 8, light and dark  
 11 purple lines).

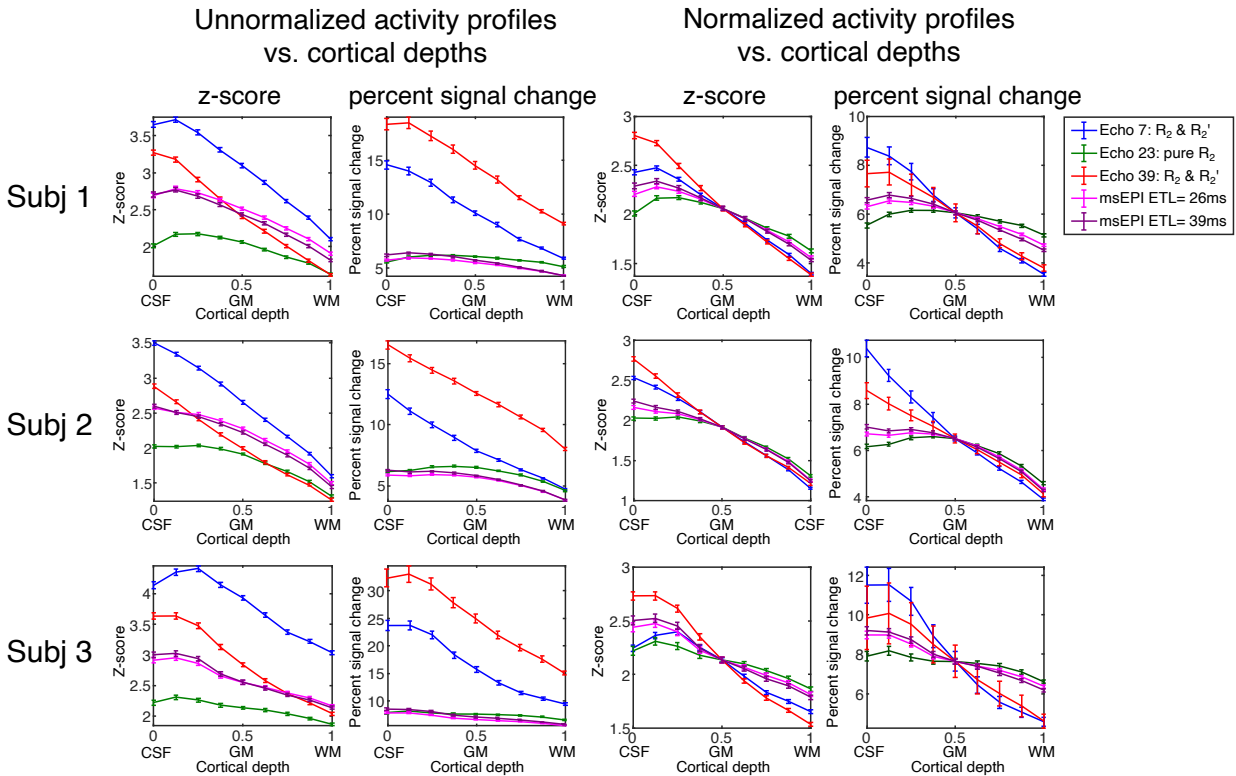

12  
 13 **Figure 8.** Cortical-depth profiles of the unnormalized (left two columns) and normalized (right two  
 14 columns) z-score and percent signal change in three subjects ( $N = 3$ ). Five EPTI data are compared in each  
 15 plot, including selected ASE images (echo 7 and 39), pure SE image (echo 23), extracted SE ms-EPI with  
 16 ETL = 26 ms and 39 ms. In all three subjects, the pure SE image shows the lowest slope with decreased  
 17 activation at the CSF-GM interface, indicating a reduced level of bias from large veins.

18 Further validation comparing the EPTI acquired images with the actual acquired commonly-used in-  
 19 plane accelerated single-shot GE and SE EPI is shown in Fig. 9. The ASE EPTI images (Echo 7 and 39)



1 show consistent activation localization to the conventional GE-EPI, with high level of activation in both  
 2 CSF and gray matter due to their large  $T_2'$  weighting. The cortical profile of the conventional GE-EPI also  
 3 exhibits large vessel bias near the pial surface similar to the ASE EPTI images (light blue vs. dark blue or  
 4 red). The conventional SE-EPI shows a reduced sensitivity to large vessels when compared to GE/ASE  
 5 acquisitions, but still has a higher activation in the CSF and a higher slope (Fig. 9a bottom row, left-most  
 6 column and Fig. 9b light green) when compared to the pure SE EPTI image (Fig. 9a bottom row, right-most  
 7 column and Fig. 9b dark green). This result further demonstrates the reduced draining vein effects in the  
 8 pure SE EPTI image over conventional SE-EPI image. The conventional SE ss-EPI (with a GRAPPA factor  
 9 of 3) also shows similar activation to the extracted SE ms-EPI with similar macrovascular bias. Noted that  
 10 the conventional images were acquired in a different session than EPTI data and could have potential  
 11 residual distortion, which might introduce bias when comparing them with EPTI data.

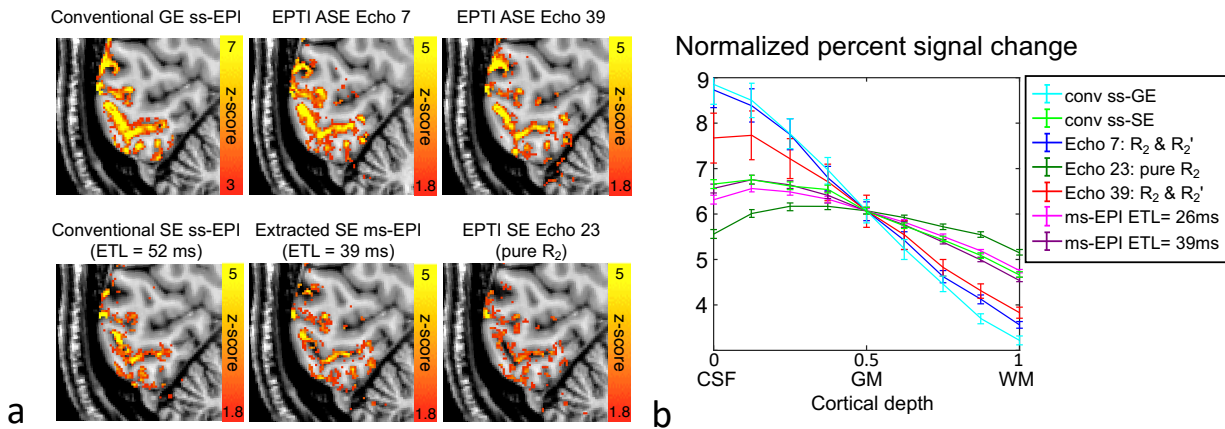

12  
 13 **Figure 9.** (a) Comparison between activation maps of the conventional GE-EPI, SE-EPI, and EPTI  
 14 images. The ASE EPTI images (echo 7 and 39) with  $T_2'$  weighting show similar activation localization as  
 15 the conventional GE-EPI, while the pure SE EPTI image (echo 23) provides less bias in CSF than the  
 16 conventional SE-EPI. (b) Comparison of the cortical-depth profiles between the acquired GE-EPI, SE-EPI,  
 17 selected EPTI echo images and EPTI extracted EPIs with different ETLs.

18 **4. Discussion and conclusions**

19 The visual-task experiments in this study preliminarily validate the ability of EPTI to time-resolve  
 20 multi-echo images at a small TE increment to investigate the varying  $T_2'$  weighting across the spin-echo  
 21 readout. The observed gradual reduction of large vessel bias in image echoes closer to SE with less and less  
 22  $T_2'$  weighting validates the expected association between  $T_2'$  contrast and the macrovascular bias. Moreover,  
 23 the pure SE image acquired by EPTI shows minimal macrovascular bias when compared to both EPTI  
 24 extracted SE-EPI and the actual acquired SE-EPI acquisition, demonstrating its minimal  $T_2'$  weighting and  
 25 a purer  $T_2$  BOLD contrast over conventional EPI (even with multiple shots) for improved microvascular  
 26 specificity. The ability of EPTI to simultaneously acquire multi-contrast images in a single scan provides a

1 powerful tool to examine the microvascular and macrovascular contribution in  $T_2$  and  $T_2'$  BOLD contrasts.  
2 This avoids potential inter-scan differences and bias in sequentially acquired multi-contrast images. The  
3 similar level and consistent localization of activation between EPTI ASEs and the GE-EPI, and between  
4 EPTI extracted SE-EPI and the actual SE-EPI (Fig. 9), validate the reliability of these multi-contrast images  
5 generated from a single EPTI dataset.

6 In this study, we focus on investigating the reduced macrovascular contribution and improved  
7 microvascular specificity using the pure  $T_2$  BOLD provided by EPTI. The multi-echo images with varying  
8  $T_2'$  and  $T_2$  BOLD contrasts, which provide both macrovascular-sensitivity and microvascular-specificity,  
9 could also potentially allow joint modeling to improve both the sensitivity and specificity to detect neuronal  
10 activation using BOLD contrast. The multi-echo images can also be used to enhance the CNR of BOLD  
11 (Poser et al., 2006; Posse et al., 1999) or to remove physiological noise through multi-echo denoising  
12 algorithms (Kundu et al., 2012; Kundu et al., 2017; Posse et al., 1999). Moreover, while our study uses a  
13 relative long center TE (64 ms) for the EPTI acquisition to allow extraction of the conventional EPI data  
14 with different ETLs from the same dataset for comparison, the unique time-resolved imaging approach  
15 grants the flexibility to shift the echo train to achieve shorter TEs (Wang et al., 2021), which could be  
16 particularly useful for investigating TE-dependent signal contributions in pure SE data. With EPTI, the  
17 extracted images spaced at a short TE increment can be used to accurately extract quantitative parameters  
18 such as  $T_2$  and  $T_2^*$ , which can be used to obtain activation map directly. Our previous work (Wang et al.,  
19 2019) has demonstrated a preliminary  $T_2^*$  fMRI experiment with GE-EPTI at 3T that could potentially help  
20 reduce vulnerability to physiological noise and motion or spin-history artifacts. Further investigation and  
21 developments should be performed on the SE-EPTI to increase its SNR for better fitting accuracy.

22 Another advantage of EPTI we presented in this study is that it eliminates the geometric distortion that  
23 is common in conventional EPI-based methods due to field inhomogeneity (Fig. 5a), which is more severe  
24 at ultra-high field and in high-resolution scans. Although post-processing methods have been developed  
25 and widely used to correct the distortion, using a field map or a pair of PE-reversed acquisition, the  
26 correction for dynamic changes in distortions due to susceptibility changes resulted from multiple sources  
27 such as head motion, system drift, and respiration still remains challenging, resulting in voxels  
28 displacements between dynamics or runs and affecting the reliability of the fMRI results. In the analysis,  
29 we have performed distortion correction of conventional EPI images using field maps calculated from pairs  
30 of PE-reversed images acquired before fMRI data acquisition, and we have also accounted for the  
31 orientation change of the field map due to subject movements. However, remaining distortion changes along  
32 the PE direction are still present across different dynamics in the time-series (Fig. 5b), resulting from  
33 susceptibility and field map changes within the scan that are hard to correct using pre-scanned field maps.  
34 This can degrade the subsequent fMRI analysis. EPTI gets rid of the geometric distortion and dynamic

1 distortion changes through its time-resolving approach, where each echo image is formed using the data  
2 acquired at the exact same echo time (same  $B_0$  phase). Such time-resolving approach can also eliminate the  
3 image blurring along PE direction due to signal decay, another major limitation of conventional EPI.

4 Instead of geometric distortion in conventional EPI, the  $B_0$  change might lead to local blurring and  
5 elevated reconstruction errors in EPTI data as reported in our previous work (Wang et al., 2019). Here, we  
6 first characterized the impact of shot-to-shot phase variation or  $B_0$  change on the multi-echo EPTI images.  
7 As expected, it was observed that the ASE images with more  $B_0$  phase accumulation are more sensitive to  
8 inter-shot variations than the pure SE image. To correct for this, the proposed reconstruction framework  
9 utilizes a navigator-based shot-to-shot  $B_0$  variation estimation that provides effective correction and  
10 significantly mitigates the potential blurring. A pre-reconstruction process was also incorporated to correct  
11 for higher-order  $B_0$  changes across dynamics that can further improve the reconstruction robustness.

12 By using the pure SE EPTI image, the cortical depth profiles of z-score and percent signal change  
13 show minimal pial surface bias. However, due to the use of the temporal correlation across echoes to  
14 reconstruct the highly-undersampled  $k$ - $t$  data, we do not rule out the possibility that there might be some  $T_2$ '  
15 contrast leakage and therefore residual pial surface bias in the pure SE EPTI image. Such leakage should  
16 be small since the signal model of the subspace reconstruction can accurately represent the signal evolution.  
17 This is also validated by the comparison with the conventional SE-EPI acquisition, where pure SE EPTI  
18 image shows minimal pial vessel bias. To systematically characterize the potential residual  $T_2$ '  
19 contamination, a generalized approach to analyze the signal response of non-linear reconstruction (e.g.,  
20 LLR-constraint subspace reconstruction in this work) might be required in the future.

21 At the current resolution, slightly higher activation can already be observed around the middle depth  
22 in the visual cortex, which might reflect higher microvascular density. Further increase in spatial resolution  
23 can help reduce partial volume effect and should provide better visualization of such laminar responses.  
24 Recent laminar fMRI studies have also shown different responses in different layers in the motor cortex  
25 (Huber et al., 2017a), which may be useful to further evaluate the EPTI approach. The temporal resolution  
26 of EPTI acquisition could also be improved to increase the statistical power of fMRI analysis. These can  
27 be achieved by further developments of our EPTI-fMRI method to enable faster  $k$ - $t$  encoding, such as by  
28 incorporating low-rank modelling across the fMRI time-series or by utilizing more advanced  $k$ - $t$  sampling  
29 trajectories, which will then open up an exciting opportunity to perform pure SE-fMRI at higher  
30 spatiotemporal resolution and larger spatial coverage.

1 **Acknowledgment**

2 This work was supported by the NIH NIBIB (R01-EB020613, R01-EB019437, R01-MH116173,  
3 R01EB016695, P41EB030006, and U01-EB025162) and the instrumentation Grants (S10OD023637, S10-  
4 OD02363701, S10-RR023401, S10-RR023043, and S10-RR019307). We thank Azma Mareyam for  
5 providing the 64-channel phased-array coil used in this study.

## 1 References

- 2 Andersson, J.L.R., Skare, S., Ashburner, J., 2003. How to correct susceptibility distortions in spin-echo  
3 echo-planar images: application to diffusion tensor imaging. *Neuroimage* 20, 870-888.
- 4 Bandettini, P.A., Wong, E.C., 1995. Effects of biophysical and physiologic parameters on brain  
5 activation-induced R2\* and R2 changes: simulations using a deterministic diffusion model. *Int. J.*  
6 *Imaging Syst. Technol.* 6, 133-152.
- 7 Bandettini, P.A., Wong, E.C., Hinks, R.S., Tikofsky, R.S., Hyde, J.S., 1992. Time course EPI of human  
8 brain function during task activation. *Magn. Reson. Med.* 25, 390-397.
- 9 Bandettini, P.A., Wong, E.C., Jesmanowicz, A., Hinks, R.S., Hyde, J.S., 1994. Spin-echo and gradient-  
10 echo EPI of human brain activation using BOLD contrast: a comparative study at 1.5 T. *NMR*  
11 *Biomed.* 7, 12-20.
- 12 Barth, M., Meyer, H., Kannengiesser, S.A., Polimeni, J.R., Wald, L.L., Norris, D.G., 2010. T2-weighted  
13 3D fMRI using S2-SSFP at 7 tesla. *Magn. Reson. Med.* 63, 1015-1020.
- 14 Beckett, A.J., Dadakova, T., Townsend, J., Huber, L., Park, S., Feinberg, D.A., 2020. Comparison of  
15 BOLD and CBV using 3D EPI and 3D GRASE for cortical layer functional MRI at 7 T. *Magn. Reson.*  
16 *Med.* 84, 3128-3145.
- 17 Birn, R., Bandettini, P., 2002. The effect of T2' changes on spin-echo EPI-derived brain activation maps.  
18 *Proc. Intl. Soc. Mag. Reson. Med., Honolulu*, 1324.
- 19 Bowen, C., Menon, R., Gati, J., 2005. High field balanced-SSFP fMRI: a BOLD technique with  
20 excellent tissue sensitivity and superior large vessel suppression. *Proc. Intl. Soc. Mag. Reson. Med.,*  
21 119.
- 22 Boxerman, J.L., Hamberg, L.M., Rosen, B.R., Weisskoff, R.M., 1995. MR contrast due to intravascular  
23 magnetic susceptibility perturbations. *Magn. Reson. Med.* 34, 555-566.
- 24 Chai, Y., Li, L., Huber, L., Poser, B.A., Bandettini, P.A., 2020. Integrated VASO and perfusion contrast:  
25 A new tool for laminar functional MRI. *Neuroimage* 207, 116358.
- 26 Chamberlain, R., Park, J.Y., Corum, C., Yacoub, E., Ugurbil, K., Jack Jr, C.R., Garwood, M., 2007.  
27 RASER: a new ultrafast magnetic resonance imaging method. *Magn. Reson. Med.* 58, 794-799.
- 28 Constable, R.T., Kennan, R.P., Puce, A., McCarthy, G., Gore, J.C., 1994. Functional NMR imaging using  
29 fast spin echo at 1.5 T. *Magn. Reson. Med.* 31, 686-690.
- 30 Cox, R.W., 1996. AFNI: software for analysis and visualization of functional magnetic resonance  
31 neuroimages. *Comput. Biomed. Res.* 29, 162-173.
- 32 De Martino, F., Yacoub, E., Kemper, V., Moerel, M., Uludağ, K., De Weerd, P., Ugurbil, K., Goebel, R.,  
33 Formisano, E., 2018. The impact of ultra-high field MRI on cognitive and computational  
34 neuroimaging. *Neuroimage* 168, 366-382.
- 35 De Martino, F., Zimmermann, J., Muckli, L., Ugurbil, K., Yacoub, E., Goebel, R., 2013. Cortical depth  
36 dependent functional responses in humans at 7T: improved specificity with 3D GRASE. *PloS one* 8,  
37 e60514.
- 38 Denolin, V., Metens, T., 2003. Three-dimensional BOLD fMRI with spin-echo characteristics using T2  
39 magnetization preparation and echo-planar readouts. *Magn. Reson. Med.* 50, 132-144.
- 40 Desikan, R.S., Ségonne, F., Fischl, B., Quinn, B.T., Dickerson, B.C., Blacker, D., Buckner, R.L., Dale,  
41 A.M., Maguire, R.P., Hyman, B.T., 2006. An automated labeling system for subdividing the human  
42 cerebral cortex on MRI scans into gyral based regions of interest. *Neuroimage* 31, 968-980.
- 43 Dong, Z., Wang, F., Chan, K.S., Reese, T.G., Bilgic, B., Marques, J.P., Setsompop, K., 2021. Variable  
44 flip angle echo planar time-resolved imaging (vFA-EPTI) for fast high-resolution gradient echo  
45 myelin water imaging. *Neuroimage* 232, 117897.
- 46 Dong, Z., Wang, F., Reese, T.G., Bilgic, B., Setsompop, K., 2020. Echo planar time-resolved imaging  
47 with subspace reconstruction and optimized spatiotemporal encoding. *Magn. Reson. Med.* 84, 2442-  
48 2455.
- 49 Dumoulin, S.O., Fracasso, A., van der Zwaag, W., Siero, J.C., Petridou, N., 2018. Ultra-high field MRI:  
50 Advancing systems neuroscience towards mesoscopic human brain function. *Neuroimage* 168, 345-

1 357.

2 Feinberg, D., Harel, N., Ramanna, S., Ugurbil, K., Yacoub, E., 2008. Sub-millimeter single-shot 3D  
3 GRASE with inner volume selection for T2-weighted fMRI applications at 7 Tesla. *Proc. Intl. Soc.*  
4 *Mag. Reson. Med.*, 16, 37.

5 Fischl, B., 2012. FreeSurfer. *Neuroimage* 62, 774-781.

6 Fischl, B., Salat, D.H., Busa, E., Albert, M., Dieterich, M., Haselgrove, C., Van Der Kouwe, A., Killiany,  
7 R., Kennedy, D., Klaveness, S., 2002. Whole brain segmentation: automated labeling of  
8 neuroanatomical structures in the human brain. *Neuron* 33, 341-355.

9 Goense, J.B., Logothetis, N.K.J.M.r.i., 2006. Laminar specificity in monkey V1 using high-resolution  
10 SE-fMRI. *Magn. Reson. Med.* 24, 381-392.

11 Goerke, U., Garwood, M., Ugurbil, K., 2011. Functional magnetic resonance imaging using RASER.  
12 *Neuroimage* 54, 350-360.

13 Goerke, U., van de Moortele, P.F., Ugurbil, K., 2007. Enhanced relative BOLD signal changes in T2-  
14 weighted stimulated echoes. *Magn. Reson. Med.* 58, 754-762.

15 Griswold, M.A., Jakob, P.M., Heidemann, R.M., Nittka, M., Jellus, V., Wang, J., Kiefer, B., Haase, A.,  
16 2002. Generalized autocalibrating partially parallel acquisitions (GRAPPA). *Magn. Reson. Med.* 47,  
17 1202-1210.

18 Havlicek, M., Uludağ, K., 2020. A dynamical model of the laminar BOLD response. *NeuroImage* 204,  
19 116209.

20 Heinzle, J., Koopmans, P.J., den Ouden, H.E., Raman, S., Stephan, K.E., 2016. A hemodynamic model  
21 for layered BOLD signals. *Neuroimage* 125, 556-570.

22 Huber, L., Finn, E.S., Chai, Y., Goebel, R., Stirnberg, R., Stöcker, T., Marrett, S., Uludag, K., Kim, S.G.,  
23 Han, S., 2020. Layer-dependent functional connectivity methods. *Prog. Neurobiol.*, 101835.

24 Huber, L., Handwerker, D.A., Jangraw, D.C., Chen, G., Hall, A., Stüber, C., Gonzalez-Castillo, J.,  
25 Ivanov, D., Marrett, S., Guidi, M., 2017a. High-resolution CBV-fMRI allows mapping of laminar  
26 activity and connectivity of cortical input and output in human M1. *Neuron* 96, 1253-1263. e1257.

27 Huber, L., Ivanov, D., Krieger, S.N., Streicher, M.N., Mildner, T., Poser, B.A., Möller, H.E., Turner, R.,  
28 2014. Slab-selective, BOLD-corrected VASO at 7 Tesla provides measures of cerebral blood volume  
29 reactivity with high signal-to-noise ratio. *Magn. Reson. Med.* 72, 137-148.

30 Huber, L., Uludağ, K., Möller, H.E., 2019. Non-BOLD contrast for laminar fMRI in humans: CBF, CBV,  
31 and CMRO2. *Neuroimage* 197, 742-760.

32 Huber, L., Uludağ, K., Möller, H.E., 2017b. Non-BOLD contrast for laminar fMRI in humans: CBF,  
33 CBV, and CMRO2. *NeuroImage* 197:742-60.

34 Jenkinson, M., Beckmann, C.F., Behrens, T.E., Woolrich, M.W., Smith, S.M., 2012. Fsl. *Neuroimage*  
35 62, 782-790.

36 Jin, T., Kim, S.-G., 2006. Spatial dependence of CBV-fMRI: a comparison between VASO and contrast  
37 agent based methods. *Conf Proc IEEE Eng Med Biol Soc.*, 25-28.

38 Kemper, V.G., De Martino, F., Vu, A.T., Poser, B.A., Feinberg, D.A., Goebel, R., Yacoub, E., 2015. Sub-  
39 millimeter T2 weighted fMRI at 7 T: comparison of 3D-GRASE and 2D SE-EPI. *Front. Neurosci.*  
40 9, 163.

41 Koopmans, P.J., Yacoub, E., 2019. Strategies and prospects for cortical depth dependent T2 and T2\*  
42 weighted BOLD fMRI studies. *Neuroimage*, 197, 668-676.

43 Kundu, P., Inati, S.J., Evans, J.W., Luh, W.M., Bandettini, P.A., 2012. Differentiating BOLD and non-  
44 BOLD signals in fMRI time series using multi-echo EPI. *Neuroimage* 60, 1759-1770.

45 Kundu, P., Voon, V., Balchandani, P., Lombardo, M.V., Poser, B.A., Bandettini, P.A., 2017. Multi-echo  
46 fMRI: a review of applications in fMRI denoising and analysis of BOLD signals. *Neuroimage* 154,  
47 59-80.

48 Kwong, K.K., Belliveau, J.W., Chesler, D.A., Goldberg, I.E., Weisskoff, R.M., Poncelet, B.P., Kennedy,  
49 D.N., Hoppel, B.E., Cohen, M.S., Turner, R., 1992. Dynamic magnetic resonance imaging of human  
50 brain activity during primary sensory stimulation. *Proc. Natl. Acad. Sci.* 89, 5675-5679.

51 Liang, Z.-P., 2007. Spatiotemporal imaging with partially separable functions. *Proc. IEEE Int. Symp.*

1 Biomed. Imaging, 988-991.

2 Lu, H., Golay, X., Pekar, J.J., Van Zijl, P.C., 2003. Functional magnetic resonance imaging based on  
3 changes in vascular space occupancy. *Magn. Reson. Med.* 50, 263-274.

4 Lu, H., Van Zijl, P.C., Hendrikse, J., Golay, X., 2004. Multiple acquisitions with global inversion cycling  
5 (MAGIC): a multislice technique for vascular-space-occupancy dependent fMRI. *Magn. Reson. Med.*  
6 51, 9-15.

7 Mareyam, A., Kirsch, J.E., Chang, Y., Madan, G., Wald, L.L., 2020. A 64-Channel 7T array coil for  
8 accelerated brain MRI. *Proc. Intl. Soc. Mag. Reson. Med.*, 764.

9 Markuerkiaga, I., Barth, M., Norris, D.G., 2016. A cortical vascular model for examining the specificity  
10 of the laminar BOLD signal. *Neuroimage*, 132, 491-498.

11 Miller, K.L., Hargreaves, B.A., Lee, J., Ress, D., Christopher deCharms, R., Pauly, J.M., 2003.  
12 Functional brain imaging using a blood oxygenation sensitive steady state. *Magn. Reson. Med.* 50,  
13 675-683.

14 Norris, D.G., Polimeni, J.R., 2019. Laminar (f) MRI: A short history and future prospects. *NeuroImage*  
15 197, 643-649,

16 Norris, D.G., 2012. Spin-echo fMRI: the poor relation? *Neuroimage* 62, 1109-1115.

17 Ogawa, S., Lee, T.-M., Kay, A.R., Tank, D.W., 1990. Brain magnetic resonance imaging with contrast  
18 dependent on blood oxygenation. *Proc. Natl. Acad. Sci.* 87, 9868-9872.

19 Ogawa, S., Menon, R., Tank, D., Kim, S., Merkle, H., Ellermann, J., Ugurbil, K., 1993. Functional brain  
20 mapping by blood oxygenation level-dependent contrast magnetic resonance imaging. A comparison  
21 of signal characteristics with a biophysical model. *Biophys. J.* 64, 803-812.

22 Olman, C.A., Harel, N., Feinberg, D.A., He, S., Zhang, P., Ugurbil, K., Yacoub, E., 2012. Layer-specific  
23 fMRI reflects different neuronal computations at different depths in human V1. *PloS one* 7, e32536.

24 Park, S., Torrisi, S., Townsend, J.D., Beckett, A., Feinberg, D.A., 2021. Highly accelerated  
25 submillimeter resolution 3D GRASE with controlled blurring in-weighted functional MRI at 7 Tesla:  
26 A feasibility study. *Magn. Reson. Med.* 85, 2490-2506.

27 Polimeni, J., Zaretskaya, N., Stelzer, J., Bause, J., Ehses, P., Wald, L., Scheffler, K., 2017. Macrovascular  
28 contributions to high-resolution balanced SSFP-and GE-EPI-based fMRI at 9.4 T evaluated using  
29 surface-based cortical depth analyses in human visual cortex. *Proc. Intl. Soc. Mag. Reson. Med.*,  
30 5255.

31 Poser, B.A., Norris, D.G., 2007. Fast spin echo sequences for BOLD functional MRI. *Magn. Reson.*  
32 *Mater. Phys.* 20, 11.

33 Poser, B.A., Versluis, M.J., Hoogduin, J.M., Norris, D.G., 2006. BOLD contrast sensitivity enhancement  
34 and artifact reduction with multiecho EPI: parallel-acquired inhomogeneity-desensitized fMRI.  
35 *Magn. Reson. Med.* 55, 1227-1235.

36 Posse, S., Wiese, S., Gembris, D., Mathiak, K., Kessler, C., Grosse-Ruyken, M.L., Elghahwagi, B.,  
37 Richards, T., Dager, S.R., Kiselev, V.G., 1999. Enhancement of BOLD-contrast sensitivity by single-  
38 shot multi-echo functional MR imaging. *Magn. Reson. Med.* 42, 87-97.

39 Pruessmann, K.P., Weiger, M., Scheidegger, M.B., Boesiger, P., 1999. SENSE: sensitivity encoding for  
40 fast MRI. *Magn. Reson. Med.* 42, 952-962.

41 Scheffler, K., Seifritz, E., Bilecen, D., Venkatesan, R., Hennig, J., Deimling, M., Haacke, E.M., 2001.  
42 Detection of BOLD changes by means of a frequency-sensitive trueFISP technique: preliminary  
43 results. *NMR Biomed.* 14, 490-496.

44 Smith, S.M., Jenkinson, M., Woolrich, M.W., Beckmann, C.F., Behrens, T.E., Johansen-Berg, H.,  
45 Bannister, P.R., De Luca, M., Drobnjak, I., Flitney, D.E., 2004. Advances in functional and structural  
46 MR image analysis and implementation as FSL. *Neuroimage* 23, S208-S219.

47 Splitthoff, D., Zaitsev, M., 2009. SENSE shimming (SSH): a fast approach for determining B0 field  
48 inhomogeneities using sensitivity coding. *Magn. Reson. Med.* 62, 1319-1325.

49 Tamir, J.I., Uecker, M., Chen, W., Lai, P., Alley, M.T., Vasanawala, S.S., Lustig, M., 2017. T2 shuffling:  
50 sharp, multicontrast, volumetric fast spin-echo imaging. *Magn. Reson. Med.* 77, 180-195.

51 van der Kouwe, A.J., Benner, T., Salat, D.H., Fischl, B., 2008. Brain morphometry with multiecho

1 MPRAGE. *Neuroimage* 40, 559-569.

2 Versluis, M., Sutton, B., De Bruin, P., Börnert, P., Webb, A., Van Osch, M., 2012. Retrospective image  
3 correction in the presence of nonlinear temporal magnetic field changes using multichannel navigator  
4 echoes. *Magn. Reson. Med.* 68, 1836-1845.

5 Waehnert, M., Dinse, J., Weiss, M., Streicher, M.N., Waehnert, P., Geyer, S., Turner, R., Bazin, P.-L.,  
6 2014. Anatomically motivated modeling of cortical laminae. *Neuroimage* 93, 210-220.

7 Waehnert, M.D., Dinse, J., Schäfer, A., Geyer, S., Bazin, P.-L., Turner, R., Tardif, C.L., 2016. A subject-  
8 specific framework for in vivo myeloarchitectonic analysis using high resolution quantitative MRI.  
9 *Neuroimage* 125, 94-107.

10 Wallace, T.E., Afacan, O., Kober, T., Warfield, S.K., 2020. Rapid measurement and correction of  
11 spatiotemporal B0 field changes using FID navigators and a multi-channel reference image. *Magn.*  
12 *Reson. Med.* 83, 575-589.

13 Wang, F., Dong, Z., Reese, T.G., Bilgic, B., Katherine Manhard, M., Chen, J., Polimeni, J.R., Wald, L.L.,  
14 Setsompop, K., 2019. Echo planar time-resolved imaging (EPTI). *Magn. Reson. Med.* 81, 3599-3615.

15 Wang, F., Dong, Z., Tian, Q., Chen, J., Blazejewska, A.I., Reese, T.G., Polimeni, J.R., Setsompop, K.,  
16 2020. Cortical-depth dependence of pure T2-weighted BOLD fMRI with minimal T2' contamination  
17 using Echo-Planar Time-resolved Imaging (EPTI). *Proc. Intl. Soc. Mag. Reson. Med.* 1229.

18 Wang, F., Dong, Z., Wald, L.L., Polimeni, J.R., Setsompop, K., 2021. Simultaneous pure spin-echo and  
19 gradient-echo BOLD fMRI using Echo Planar Time-resolved Imaging (EPTI) for mapping laminar  
20 fMRI responses. *Proc. Intl. Soc. Mag. Reson. Med.* 631.

21 Yacoub, E., Duong, T.Q., Van De Moortele, P.F., Lindquist, M., Adriany, G., Kim, S.G., Uğurbil, K., Hu,  
22 X., 2003. Spin-echo fMRI in humans using high spatial resolutions and high magnetic fields. *Magn.*  
23 *Reson. Med.* 49, 655-664.

24
